# Supplementary material for: Pharmacokinetic Evaluation of a Novel Transdermal Ketoprofen Formulation in Healthy Dogs
Source: MDPI journal article supplement (doi:10.3390/pharmaceutics14030646), 2022-03-15
Supplement: s1 [file s1]

# Supplementary Materials: Pharmacokinetic Evaluation of a Novel Transdermal Ketoprofen Formulation in Healthy Dogs

Halley Gora Ravuri, Nana Satake, Alexandra Balmanno, Jazmine Skinner, Samantha Kempster and Paul C. Mills

**Table S1.** List of vehicles tested for solubility for meloxicam, tolfenamic acid, ketoprofen and carprofen.

| Sl.no | Name of the vehicle                                  | Drug conc at 1% |                 |            |           | Drug conc at 5%              |                              |            |                              |
|-------|------------------------------------------------------|-----------------|-----------------|------------|-----------|------------------------------|------------------------------|------------|------------------------------|
|       |                                                      | Meloxicam       | Tolfenamic acid | Ketoprofen | Carprofen | Meloxicam                    | Tolfenamic acid              | Ketoprofen | Carprofen                    |
| 1.    | Propylene glycol (PG)                                | dissolved       | dissolved       | dissolved  | dissolved | precipitated and undissolved | precipitated and undissolved | dissolved# | precipitated and undissolved |
| 2.    | Isopropyl myristate (IPM)                            | dissolved       | dissolved       | dissolved  | dissolved | precipitated and undissolved | precipitated and undissolved | dissolved# | precipitated and undissolved |
| 3.    | diethylene glycol monoethyl ether (DGME; Transcutol) | dissolved       | dissolved       | dissolved  | dissolved | precipitated and undissolved | precipitated and undissolved | dissolved# | dissolved*                   |
| 4.    | Dimethyl sulphoxide (DMSO)                           | dissolved       | dissolved       | dissolved  | dissolved | dissolved                    | precipitated and undissolved | dissolved# | dissolved*                   |
| 5.    | Stearyl octanoate and cetyl octanoate (SCO -LQ-(MH)  | dissolved       | dissolved       | dissolved  | dissolved | precipitated and undissolved | precipitated and undissolved | dissolved# | precipitated and undissolved |
| 6.    | Ethanol + Isopropyl myristate (50:50)                | dissolved       | dissolved       | dissolved  | dissolved | precipitated and undissolved | precipitated and undissolved | dissolved# | precipitated and undissolved |
| 7.    | Oleic acid (OA)                                      | dissolved       | precipitated    | dissolved  | dissolved | precipitated and undissolved | precipitated and undissolved | dissolved  | precipitated and undissolved |
| 8.    | Oleic acid + Isopropyl myristate (50:50)             | dissolved       | dissolved       | dissolved  | dissolved | precipitated and undissolved | precipitated and undissolved | dissolved# | precipitated and undissolved |
| 9.    | Eucalyptus oil + (Isopropyl myristate – ethanol)     | dissolved       | dissolved       | dissolved  | dissolved | precipitated and undissolved | precipitated and undissolved | dissolved# | precipitated and undissolved |
| 10.   | Dimethyl formamide (DMF)                             | dissolved       | dissolved       | dissolved  | dissolved | dissolved                    | precipitated and undissolved | dissolved# | dissolved*                   |
| 11.   | 50% Dimethyl formamide in H2O                        | dissolved       | dissolved       | dissolved  | dissolved | precipitated and undissolved | precipitated and undissolved | dissolved# | dissolved*                   |
| 12.   | 100% ethanol                                         | dissolved       | dissolved       | dissolved  | dissolved | precipitated and undissolved | precipitated and undissolved | dissolved# | precipitated and undissolved |
| 13.   | 100% isopropanol                                     | dissolved       | dissolved       | dissolved  | dissolved | precipitated and undissolved | precipitated and undissolved | dissolved# | precipitated and undissolved |

|     |                                                      |           |              |           |           |                              |                              |            |                              |
|-----|------------------------------------------------------|-----------|--------------|-----------|-----------|------------------------------|------------------------------|------------|------------------------------|
| 14. | 50% ethanol in H <sub>2</sub> O                      | dissolved | precipitated | dissolved | dissolved | precipitated and undissolved | precipitated and undissolved | dissolved# | precipitated and undissolved |
| 15. | 50% isopropanol in H <sub>2</sub> O                  | dissolved | precipitated | dissolved | dissolved | precipitated and undissolved | precipitated and undissolved | dissolved# | precipitated and undissolved |
| 16. | Dimethyl acetamide (DMA)                             | dissolved | dissolved    | dissolved | dissolved | dissolved                    | precipitated and undissolved | dissolved# | precipitated and undissolved |
| 17. | Benzyl alcohol                                       | dissolved | dissolved    | dissolved | dissolved | dissolved                    | precipitated and undissolved | dissolved# | dissolved*                   |
| 18. | corn oil (CO)                                        | dissolved | precipitated | dissolved | dissolved | precipitated and undissolved | precipitated and undissolved | dissolved  | precipitated and undissolved |
| 19. | Eucalyptus oil (EU)                                  | dissolved | dissolved    | dissolved | dissolved | precipitated and undissolved | precipitated and undissolved | dissolved# | precipitated and undissolved |
| 20. | Limonene                                             | dissolved | dissolved    | dissolved | dissolved | precipitated and undissolved | precipitated and undissolved | dissolved# | precipitated and undissolved |
| 21. | Eucalyptol (1,4-Cineole)                             | dissolved | dissolved    | dissolved | dissolved | precipitated and undissolved | precipitated and undissolved | dissolved# | precipitated and undissolved |
| 22. | 50% DMSO in H <sub>2</sub> O                         | dissolved | dissolved    | dissolved | dissolved | precipitated and undissolved | precipitated and undissolved | dissolved# | dissolved*                   |
| 23. | Tween 80 (polysorbate 80)                            | dissolved | precipitated | dissolved | dissolved | precipitated and undissolved | precipitated and undissolved | dissolved# | precipitated and undissolved |
| 24. | Span 20 (Sorbitan monolaurate)                       | dissolved | precipitated | dissolved | dissolved | precipitated and undissolved | precipitated and undissolved | dissolved# | precipitated and undissolved |
| 25. | Methanol                                             | dissolved | dissolved    | dissolved | dissolved | precipitated and undissolved | precipitated and undissolved | dissolved# | dissolved*                   |
| 26. | 50% methanol + 50% Propylene glycol                  | dissolved | dissolved    | dissolved | dissolved | precipitated and undissolved | precipitated and undissolved | dissolved# | precipitated and undissolved |
| 27. | 50% Propylene glycol + 50 % ethanol                  | dissolved | dissolved    | dissolved | dissolved | precipitated and undissolved | precipitated and undissolved | dissolved# | precipitated and undissolved |
| 28. | Stearyl octanoate + (Isopropyl myristate – ethanol)  | dissolved | dissolved    | dissolved | dissolved | precipitated and undissolved | precipitated and undissolved | dissolved# | precipitated and undissolved |
| 29. | Dimethyl formamide + (Isopropyl myristate – ethanol) | dissolved | dissolved    | dissolved | dissolved | precipitated and undissolved | precipitated and undissolved | dissolved# | dissolved*                   |
| 30. | Dimethyl acetamide + (Isopropyl                      | dissolved | dissolved    | dissolved | dissolved | precipitated and undissolved | precipitated and undissolved | dissolved# | dissolved*                   |

|     |                                                      |           |           |           |           |                              |                              |            |                              |
|-----|------------------------------------------------------|-----------|-----------|-----------|-----------|------------------------------|------------------------------|------------|------------------------------|
|     | myristate – ethanol)                                 |           |           |           |           |                              |                              |            |                              |
| 31. | Eucalyptus oil + (Isopropyl myristate – isopropanol) | dissolved | dissolved | dissolved | dissolved | precipitated and undissolved | precipitated and undissolved | dissolved# | precipitated and undissolved |
| 32. | Benzyl alcohol + (Isopropyl myristate – ethanol)     | dissolved | dissolved | dissolved | dissolved | precipitated and undissolved | precipitated and undissolved | dissolved# | precipitated and undissolved |
| 33. | Benzyl alcohol + (Isopropyl myristate – isopropanol) | dissolved | dissolved | dissolved | dissolved | precipitated and undissolved | precipitated and undissolved | dissolved# | precipitated and undissolved |
| 34. | Isopropanol (45%), isopropyl myristate (45%)         | dissolved | dissolved | dissolved | dissolved | precipitated and undissolved | precipitated and undissolved | dissolved# | precipitated and undissolved |
| 35. | Isopropanol (45%), Transcutol (45%)                  | dissolved | dissolved | dissolved | dissolved | precipitated and undissolved | precipitated and undissolved | dissolved# | precipitated and undissolved |
| 36. | 5% menthol in Ethanol-H2O                            | dissolved | dissolved | dissolved | dissolved | precipitated and undissolved | precipitated and undissolved | dissolved# | precipitated and undissolved |

\*: Carprofen dissolved at 10% (*w/v*) concentration; #: Ketoprofen dissolved at 10% (*w/v*) concentration.

**Table S2.** List of vehicles tested for initial in vitro permeability of ketoprofen (10% *w/v*) through dog skin, to pick best penetration enhancers in final combinations.

| Sl.no | Vehicles tested                                        |
|-------|--------------------------------------------------------|
| 1.    | Ethanol (10%, 20%, 30%, 40%, 50%) in water             |
| 2.    | Isopropanol (10%, 20%, 30%, 40%, 50%) in water         |
| 3.    | Eucalyptus oil (1%, 5%, 10%) in isopropanol            |
| 4.    | Menthol (1%, 5%, 10%) in water                         |
| 5.    | Limonene (1%, 5%, 10%) in isopropanol                  |
| 6.    | Isopropyl myristate (10%, 20%, 30%, 40%, 50%) in water |
| 7.    | Transcutol (10%, 20%, 30%, 40%, 50%) in water          |
| 8.    | Oleic acid + Isopropyl myristate (50:50)               |
| 9.    | Ethanol + Isopropyl myristate (50:50)                  |
| 10.   | Isopropanol + Isopropyl myristate (50:50)              |

**Table S3.** Final vehicle combinations tested for ketoprofen at 10% (W/V) concentration using Franz cells.

| List of formulations | Combination of vehicles used for each formulation                               |
|----------------------|---------------------------------------------------------------------------------|
| F1                   | Ethanol (45%), oleic acid (45%), eucalyptus oil (10%)                           |
| F2                   | Ethanol (35%) isopropyl myristate (35%), Transcutol (20%) eucalyptus oil (10%). |
| F3                   | Ethanol (45%), Transcutol (45%), eucalyptus oil (10%)                           |
| F4                   | Isopropanol (45%), Transcutol (45%), eucalyptus oil (10%)                       |
| F5                   | Isopropanol (45%), isopropyl myristate (45%), eucalyptus oil (10%)              |
| F6                   | Ethanol (45%), isopropyl myristate (45%), eucalyptus oil (10%)                  |
| F7                   | Ethanol (45%), Transcutol (45%), menthol (10%)                                  |
| F8                   | Isopropanol (45%), Stearyl octanoate (45%), eucalyptol (10%)                    |
| F9                   | Isopropanol (45%), STSCQ (45%), eucalyptol (10%)                                |
| F10                  | Isopropanol (45%), PMP (45%), eucalyptus oil (10%)                              |
| F11                  | Isopropanol (45%), Polyethylene glycol 400 (45%), eucalyptus oil (10%)          |

---

|     |                                                                                                                  |
|-----|------------------------------------------------------------------------------------------------------------------|
| F12 | Ethanol (45%), polyethylene glycol 400 (45%), eucalyptus oil (10%)                                               |
| F13 | Ethanol (45%), isopropyl myristate (45%), limonene (10%)                                                         |
| F14 | Ethanol (45%), isopropyl myristate (45%), menthol (10%)                                                          |
| F15 | Ethanol (50%), isopropyl myristate (35%), <i>dimethylformamide</i> (5%), <i>eucalyptus oil</i> (10%)             |
| F16 | Ethanol (40%), isopropyl myristate (20%), eucalyptus oil (10%), transcitol (10%), <i>dimethylformamide</i> (20%) |

---
